# Supplementary material for: A synthetic biology-based device prevents liver injury in mice
Source: PubMed Central journal article supplement — J Hepatol. 2016 Jul;65(1):84–94. doi: 10.1016/j.jhep.2016.03.020 (PMC4914822; doi:10.1016/j.jhep.2016.03.020), 2016-07
Supplement: mmc1.pdf [file mmc1.pdf]

# **A synthetic biology-based device prevents liver injury in mice.**

Peng Bai, Haifeng Ye, Mingqi Xie, Pratik Saxena, Henryk Zulewski, Ghislaine Charpin-El Hamri, Valentin Djonov, Martin Fussenegger

## **Table of contents**

|                                                 |           |
|-------------------------------------------------|-----------|
| <b>Supplementary materials and methods.....</b> | <b>2</b>  |
| <b>Supplementary Fig. 1.....</b>                | <b>6</b>  |
| <b>Supplementary Fig. 2.....</b>                | <b>7</b>  |
| <b>Supplementary Fig. 3.....</b>                | <b>9</b>  |
| <b>Supplementary Fig. 4.....</b>                | <b>11</b> |
| <b>Supplementary Fig. 5.....</b>                | <b>12</b> |
| <b>References.....</b>                          | <b>13</b> |

## Supplementary materials and methods

**Analytical assays. Alanine aminotransferase.** Serum levels of alanine aminotransferase (ALT) were determined by an ALT Activity Assay (Sigma-Aldrich; cat. no. MAK052, lot. no. B9G150752V). **Bile acids.** Serum bile acid levels were quantified using a mouse Total Bile Acids Assay Kit (Crystal Chem, Downers Grove, IL; cat. no. 80470, lot. no. MTB01140213). **Bilirubin.** Serum bilirubin levels were profiled using a Bilirubin Assay Kit (Sigma Aldrich; cat. no. MAK126-1KT, lot. no. BE12A01V). **cAMP.** Intracellular cAMP levels were quantified using the Cyclic AMP XP Assays Kit (Life Technologies, cat. no. 4339). In brief,  $1 \times 10^5$  cells were pretreated for 30min with FCS-free DMEM containing 0.5mM 3-isobutyl-1-methylxanthine (IBMX, Sigma-Aldrich, cat. no. I5879) and incubated for another 30min in FCS-free DMEM containing different concentrations of cholic acid before cAMP levels were determined in the cell lysates according to manufacturer's protocol. **Cell viability.** Viability was assayed using calcein AM dye (Affymetrix, Santa Clara, CA, USA; cat. no. 65-0853-39). In brief,  $1 \times 10^5$  cells were detached using StemPro<sup>®</sup>Accutase<sup>®</sup>Cell Dissociation Reagent (Life Technologies; cat. no. A11105-01) and incubated for 15min with 20nM calcein AM dye at 22°C. The samples were washed twice with PBS and analysed by FACS using a Becton Dickinson LSRII Fortessa flow cytometer (Becton Dickinson, Allschwil, Switzerland) (488nm laser, 505nm long pass filter, 530/30 emission filter). **Human hepatocyte growth factor.** Human hepatocyte growth factor (HGF) levels were scored using a human HGF ELISA kit (RayBiotech Inc., Norcross CA; lot no. 613140201). **PKA inhibition.**  $1 \times 10^5$  cells were pretreated with 10 $\mu$ M H-89 (Sigma-Aldrich, cat. no. B1472) for 1h, incubated for 2h in cell culture medium in the presence of 100 $\mu$ M cholic acid and maintained for 24h in cell culture medium in the absence of cholic acid before SEAP levels were assessed in

the cell culture supernatant. **RNA isolation and RT-PCR.** Total RNA was extracted from mammalian cells using the ZR RNA MiniPrep™ kit (Zymo Research, Irvine, CA, USA; cat. no. R1064) and TURBO™ DNase (Life Technologies, CA, USA; cat. no. AM2238). RT-PCR was performed using the High-Capacity cDNA Reverse Transcription Kit (Applied Biosystems, Foster City, CA, USA; cat. no. 4368814) according to the manufacturer's instructions. Primers specific for human TGR5 (forward, 5'-TCGTCTACTTGGCTCCCAAC-3'; reverse, 5'-GCTCATAGGCCAGGACTGAG-3') were used to detect TGR5 transcripts in HEK-293 cells. Actin mRNA (forward, 5'-AGATGTGGATCAGCAAGCAG-3'; reverse: 5'-GCGCAAGTTAGGTTTTGTCA-3') was used as control. **SEAP.** Production of human placental secreted alkaline phosphatase (SEAP) was quantified in the culture supernatant using a p-nitrophenylphosphate-based light-absorbance time course [1]. In brief, 120µL of substrate solution (100µL of 2x SEAP assay buffer [20mM homoarginine, 1mM MgCl<sub>2</sub>, 21% diethanolamine, pH9.8] and 20µL substrate solution [120mM *p*-nitrophenylphosphate]) was added to 80µL heat-inactivated (65°C, 30min) cell culture supernatant and the light absorbance was recorded at 405nm (37°C) for 30min using a GeniosPro multi-well reader (Tecan, Maennedorf, Switzerland). The SEAP levels in serum of mice were quantified using a chemiluminescence-based assay (Roche Diagnostics GmbH, Mannheim, Germany; cat. no. 11779842001) [2]. **shGLP1.** GLP-1-mIgG immunofusin levels were scored using a mouse IgG ELISA kit (Immunology Consultants Laboratory, Inc., Portland, OR; cat. no. E-90G). **Western Blot Analysis.** For immunohistochemical detection of TGR5 expression, 5x10<sup>6</sup> HEK-293 were collected 48h after transfection of pPB2 or pTGR5 and protein extracts were prepared as described before [3]. Twenty micrograms of protein were resolved on a 12% SDS polyacrylamide gel and electroblotted onto a polyvinylidene fluoride

membrane (Millipore, Billerica, MA, USA; cat. no. IPVH00010). TGR5 was visualized using a primary rabbit polyclonal anti-TGR5 antibody (Sigma-Aldrich; cat. no: HPA062890; lot no. R88059; 1:500 dilution) and a secondary horseradish-peroxidase–coupled anti-rabbit IgG antibody (AbD Serotec, Kidlington, UK; cat. no. STAR54; lot no. 050614; 1:1000 dilution). ECL Prime Western blot detection reagents (Amersham, Little Chalfont, UK; cat. no. RPN2232) were used for chemiluminescence-based signal detection by a Chemilux CCD camera (ImageQuant LAS 400 mini; GE Healthcare, Little Chalfont, UK). Actin was used as control (primary rabbit polyclonal anti-actin IgG, Sigma-Aldrich, cat. no. A2066; lot no. 103M4826V; 1:1000 dilution).

**Chemical compounds.** Cholic acid (10mM stock solution in ddH<sub>2</sub>O; Sigma-Aldrich; cat. no. C9282), taurocholic acid (10mM stock solution in ddH<sub>2</sub>O; Sigma-Aldrich; cat. no. T4009), glycocholic acid (10mM stock solution in ddH<sub>2</sub>O; Sigma-Aldrich; cat. no. G7132), chenodeoxycholic acid (10mM stock solution in ddH<sub>2</sub>O ; Sigma-Aldrich; cat. no. C8261), taurochenodeoxycholic acid (10mM stock solution in ddH<sub>2</sub>O; Sigma-Aldrich; cat. no.T6260), glycochenodeoxycholic acid (10mM stock solution in ddH<sub>2</sub>O; Sigma-Aldrich; cat. no. G0759), lithocholic acid (100mM stock solution in DMSO; Sigma-Aldrich; cat. no. L6250), tauroolithocholic acid (100mM stock solution in DMSO; Sigma-Aldrich; cat. no. T7517), glycolithocholic acid (100mM stock solution in DMSO; Santa Cruz Biotechnology; cat. no. sc-396741), ursodeoxycholic acid (100mM stock solution in DMSO; Sigma-Aldrich; Switzerland; cat. no. U5127), tauroursodeoxycholic acid (10mM stock solution in ddH<sub>2</sub>O; Merck, Schaffhausen, Switzerland; cat. no. 580549), deoxycholic acid (10mM stock solution in ddH<sub>2</sub>O; Acros Organics, Geel, Belgium; cat. no. 21859), taurodeoxycholic acid (10mM stock solution in ddH<sub>2</sub>O; Sigma-Aldrich; cat. no. T0875), glycodeoxycholic

acid (10mM stock solution in ddH<sub>2</sub>O; Sigma-Aldrich; cat. no. G9910), *L*-Norepinephrine hydrochloride (10mM stock solution in ddH<sub>2</sub>O; Sigma-Aldrich; cat. no. 74480), SDF-1 $\alpha$  (1 $\mu$ M stock solution in PBS; R&D Systems, cat. no. 350-NS), 1-Naphthyl isothiocyanate (ANIT, Sigma-Aldrich; cat. no. N4525), carbon tetrachloride (CCl<sub>4</sub>, Sigma-Aldrich; cat. no. 87031). ANIT (12.5g/L stock solution) and CCl<sub>4</sub> (12.5% (v/v) stock solution) were dissolved in olive oil (Sigma-Aldrich, cat. no. O1514).

**TubeSpin® Bioreactor operation.** Freestyle™ 293-F suspension cells were cultivated in TubeSpin® bioreactor 50 (TPP, Trasadingen, Switzerland) containing 10mL FreeStyle™ 293 Expression Medium supplemented with 1% penicillin/streptomycin solution in an 5% CO<sub>2</sub> incubator. The bioreactors were placed on an orbital shaker (IKA KS 260 basic; IKA-Werke GmbH, Staufen im Breisgau, Germany; cat. no. 0002980200) set to 200rpm. Samples for assessment of GLP-1/IgG-Fc production were centrifuged (1min, 14000 $\times$ g) and the supernatant was stored at -20°C until analysis.

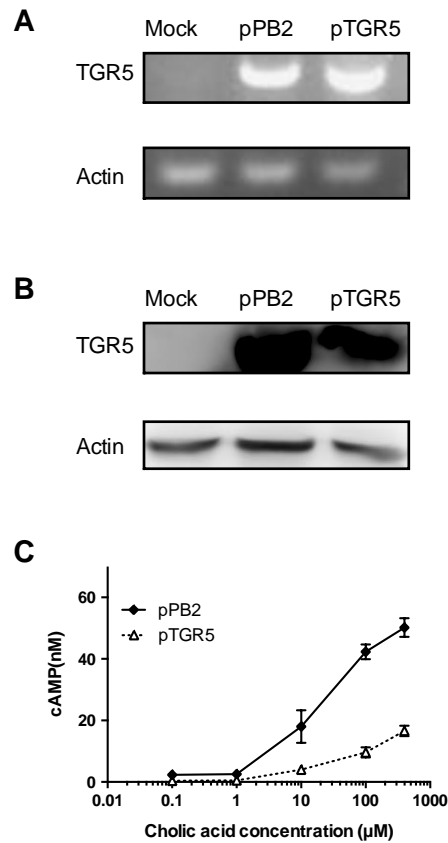

**Supplementary Fig. 1. Comparative analysis of different TGR5 expression vectors. (A, B)** TGR5 expression levels. HEK-293 cells were transfected with either pTGR5 ( $P_{hCMV}$ -TGR5-pA) or pPB2 ( $P_{hCMV^{*-1}}$ -TGR5-pA) and TGR5 transcript levels (A) and (B) protein expression levels were profiled by semi-quantitative RT-PCR and Western blot analysis after 48h, respectively. Actin was used as control. (C) Cholic acid-responsive TGR5-mediated cAMP surge. HEK-293 cells transfected with either pTGR5 or pPB2 were scored for cAMP levels in response to various concentrations of cholic acid. Data presented are mean  $\pm$  SD; n=3.

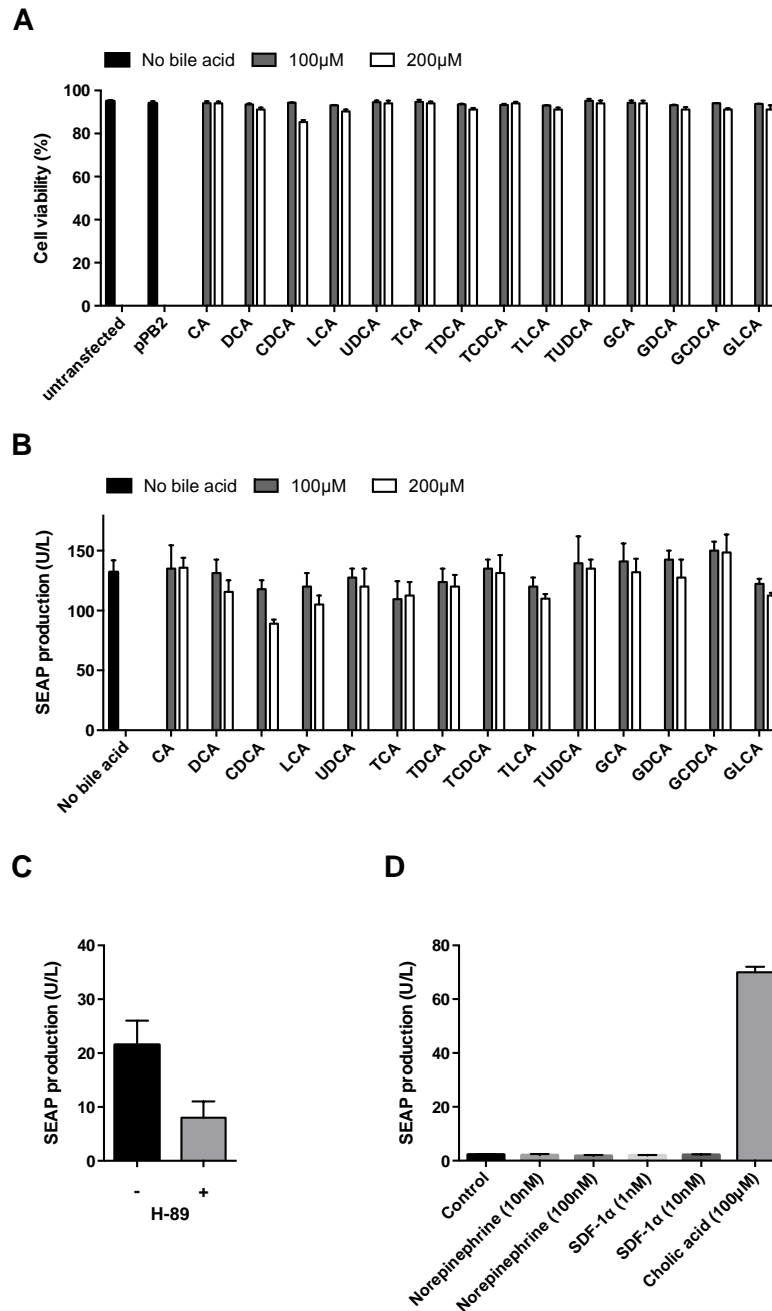

**Supplementary Fig. 2. Bile acid sensor control experiments. (A)** Impact of constitutive TGR5 expression and different bile acid derivatives on cell viability. HEK-293 cells were transfected with pPB2 and grown for 24h in cell culture medium containing different bile acid derivatives (CA, cholic acid; DCA, deoxycholic acid; CDCA, chenodeoxycholic acid; LCA, lithocholic acid; UDCA, ursodeoxycholic acid; TCA, taurocholic acid; TDCA, taurodeoxycholic acid; TCDCa, taurochenodeoxycholic

acid; TLCA, tauroolithocholic acid; TUDCA, Tauroursodeoxycholic acid; GCA, glycocholic acid; GDCA, glycodeoxycholic acid; GCDCA, glycolchenodeoxycholic acid; GLCA, glycolithocholic acid) before cell viability was profiled. **(B)** Impact of constitutive TGR5 expression and different bile acid derivatives on constitutive SEAP expression of HEK-293. HEK-293 cells were co-transfected with pPB2 and pSEAP2-Control and grown for 24h in cell culture medium containing different bile acid derivatives (CA, cholic acid; DCA, deoxycholic acid; CDCA, chenodeoxycholic acid; LCA, lithocholic acid; UDCA, ursodeoxycholic acid; TCA, taurocholic acid; TDCA, taurodeoxycholic acid; TCDCA, taurochenodeoxycholic acid; TLCA, tauroolithocholic acid; TUDCA, Tauroursodeoxycholic acid; GCA, glycocholic acid; GDCA, glycodeoxycholic acid; GCDCA, glycolchenodeoxycholic acid; GLCA, glycolithocholic acid) before SEAP levels were profiled in the culture supernatant. **(C)** Protein kinase A (PKA)-dependent bile acid signaling. HEK-293 were co-transfected with pPB2 and pSP16, treated for 1h with the PKA inhibitor H-89 (-, 0 $\mu$ M; +, 10 $\mu$ M) and grown for 2h in the presence of 100 $\mu$ M cholic acid before the culture medium was exchanged and SEAP levels profiled after 24h. **(D)** Bile acid-specificity of the TGR5-mediated cAMP-dependent signalling cascade in HEK-293 cells. HEK-293 express different endogenous GPCRs such as adrenoceptor alpha 1B (ADRA1B) and chemokine (C-X-C motif) receptor 4 (CXCR4) which also use cAMP as second messenger and whose activation by norepinephrine and stromal cell-derived factor 1 alpha (SDF-1 $\alpha$ ) may bias bile-acid control, respectively. pPB2/pSP16-cotransfected HEK-293 cells were cultivated for 24h in culture medium supplemented with physiologic concentrations of norepinephrine or SDF-1 $\alpha$  before SEAP levels were quantified in the culture supernatant. Data presented are mean  $\pm$  SD; n=3.



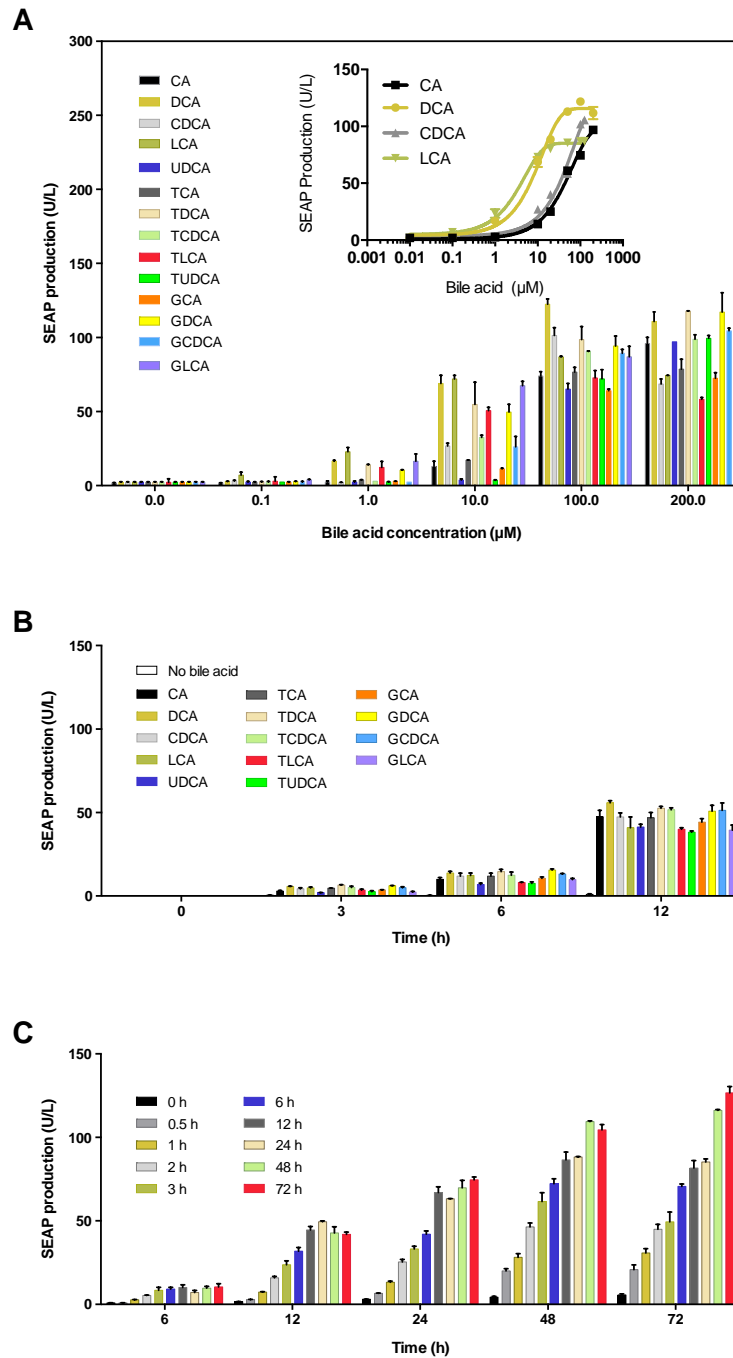

**Supplementary Fig. 3. Induction of SEAP expression by different bile acid derivatives.** (A) SEAP expression control. HEK-293 cells were co-transfected with pPB2 ( $P_{hCMV^*1}$ -TGR5-pA) and pSP16 ( $P_{CREm}$ -SEAP-pA) and cultivated for 24h in the presence of different concentrations (0-200 $\mu\text{M}$ ) of various bile acid derivatives (DCA deoxycholic acid; CDCA, chenodeoxycholic acid; LCA, lithocholic acid; UDCA, ursodeoxycholic acid; TCA, taurocholic acid; TDCA, taurodeoxycholic acid; TCDC, taurochenodeoxycholic acid; TLCA, taurochenodeoxycholic acid; TUDCA, tauroursodeoxycholic acid; GCA, glycochenodeoxycholic acid; GDCA, glycodeoxycholic acid; GCDCA, glycochenodeoxycholic acid; GLCA, glycolithocholic acid).

taurochenodeoxycholic acid; TLCA, tauroolithocholic acid; TUDCA, Tauroursodeoxycholic acid; GCA, glycocholic acid; GDCA, glycodeoxycholic acid; GCDCA, glycol-chenodeoxycholic acid; GLCA, glycolithocholic acid) before SEAP levels were profiled in the culture supernatant. Inset: log-representation of dose-dependent SEAP expression levels triggered by CA, DCA, CDCA and LCA. Data presented are mean  $\pm$  SD,  $n \geq 3$ . **(B)** Induction kinetics. HEK-293 cells were co-transfected with pPB2 and pSP16 and cultivated in the presence of various bile acid derivatives (CA, cholic acid; DCA, deoxycholic acid; CDCA, chenodeoxycholic acid; LCA, lithocholic acid; UDCA, ursodeoxycholic acid; TCA, taurocholic acid; TDCA, taurodeoxycholic acid; TCDCA, taurochenodeoxycholic acid; TLCA, tauroolithocholic acid; TUDCA, Tauroursodeoxycholic acid; GCA, glycocholic acid; GDCA, glycodeoxycholic acid; GCDCA, glycol-chenodeoxycholic acid; GLCA, glycolithocholic acid; all at 100 $\mu$ M) and SEAP levels were profiled in the culture supernatant after 3, 6, and 12h. Data presented are mean  $\pm$  SD,  $n \geq 3$ . **(C)** Exposure-time-dependent SEAP expression kinetics. pPB2/pSP16-transgenic HEK-293 cells cultivated for different periods of time in cholic acid (100 $\mu$ M)-containing medium, before the culture was switched to cholic acid-free medium and SEAP production kinetics was profiled for 72h. Data presented are mean  $\pm$  SD,  $n \geq 3$ .

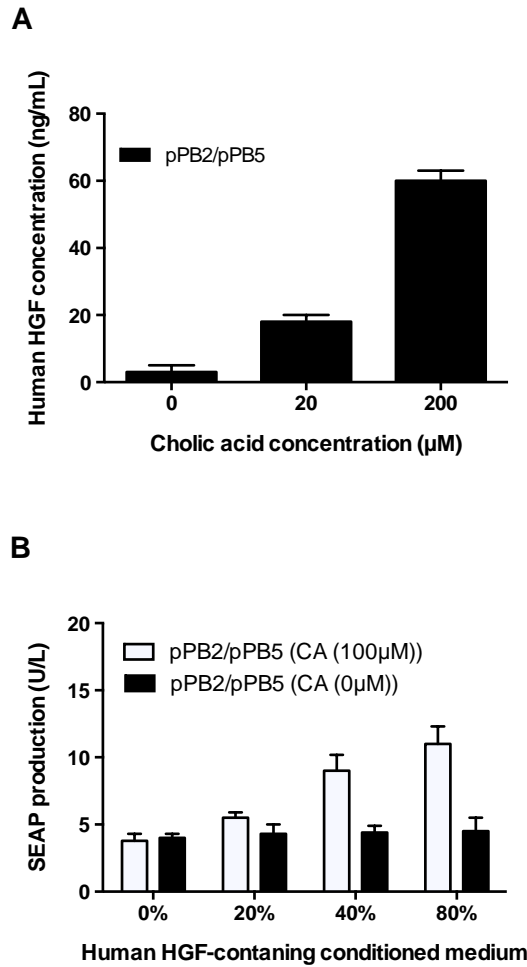

**Supplementary Fig. 4. Characterization of HGF expression *in vitro*.** (A) Cholic acid-triggered HGF expression. HEK-293 cells were co-transfected with pPB2 ( $P_{hCMV^*1}$ -TGR5-pA) and pPB5 ( $P_{CREm}$ -HGF-pA) and cultivated for 24h in the presence of different cholic acid concentrations (0-200µM) before HGF levels were profiled in the culture supernatant. (B) Validation of functional HGF production. hMSC cells were co-transfected with MK<sub>p</sub>37 ( $P_{hCMV}$ -TetR-ELK1-pA) and pMF111 ( $P_{hCMV^*1}$ -SEAP-pA) and grown in medium containing different amounts of culture supernatant of cholic acid-induced (100µM cholic acid, 24h) pPB2/pPB5-transgenic HEK-293 cells. HGF-triggered SEAP production was measured after 24h. Data presented are mean  $\pm$  SD,  $n \geq 3$ .

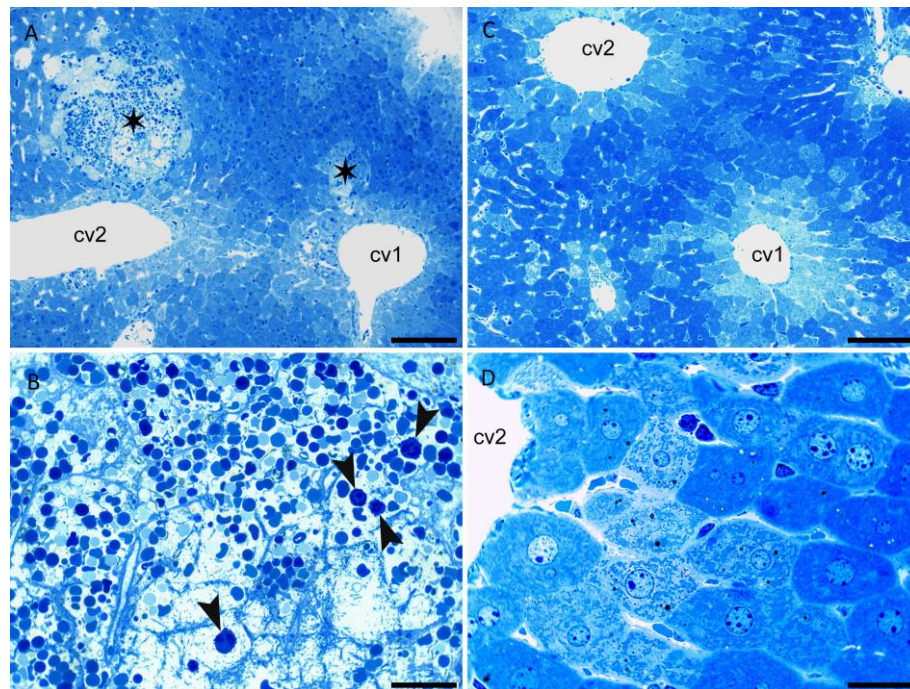

**Supplementary Fig. 5. Histological analysis of liver damage in control animals (toluidine blue staining).** (A, B) ANIT-treated animals containing placebo implants exhibit central veins (cv1, cv2) with necrotic and hemorrhagic lesions (asterisk) containing immune cell infiltrations (arrowhead) (B, larger magnification of A; scale bars: A, 100 $\mu$ m; B, 20 $\mu$ m). (C, D) Control mice implanted with the liver-protection device and treated with the diluent olive oil show normal liver structures (cv1, cv2) without any pathological changes. (D, larger magnification of C; scale bars: C, 100 $\mu$ m; D, 20 $\mu$ m).

## References

- [1] Stefan Schlatter, Markus Rimann, Jens Kelm, Fussenegger M. SAMY, a novel mammalian reporter gene derived from *Bacillusstearothermophilus*  $\alpha$ -amylase. *Gene* 2002;282:19-31.
- [2] Weber W, Rimann M, Spielmann M, Keller B, Daoud-El Baba M, Aubel D, et al. Gas-inducible transgene expression in mammalian cells and mice. *Nat Biotechnol* 2004;22:1440-1444.
- [3] Peng R-W, Guetg C, Tigges M, Fussenegger M. The vesicle-trafficking protein *munc18b* increases the secretory capacity of mammalian cells. *Metabolic Engineering* 2010;12:18-25.
